# Supplementary material for: Outcomes reported in randomised clinical trials of major depressive disorder treatments in adolescents: a systematic scoping review protocol
Source: PubMed Central journal article supplement — BMJ Open. 2019 Jan 15;9(1):e024191. doi: 10.1136/bmjopen-2018-024191 (PMC6340428; doi:10.1136/bmjopen-2018-024191), 2019-01-15
Supplement: bmjopen-2018-024191.draft_revisions.pdf [file bmjopen-2018-024191.draft_revisions.pdf]

# BMJ Open

BMJ Open is committed to open peer review. As part of this commitment we make the peer review history of every article we publish publicly available.

When an article is published we post the peer reviewers' comments and the authors' responses online. We also post the versions of the paper that were used during peer review. These are the versions that the peer review comments apply to.

The versions of the paper that follow are the versions that were submitted during the peer review process. They are not the versions of record or the final published versions. They should not be cited or distributed as the published version of this manuscript.

BMJ Open is an open access journal and the full, final, typeset and author-corrected version of record of the manuscript is available on our site with no access controls, subscription charges or pay-per-view fees (<http://bmjopen.bmj.com>).

If you have any questions on BMJ Open's open peer review process please email [editorial.bmjopen@bmj.com](mailto:editorial.bmjopen@bmj.com)

# BMJ Open

## Outcome reporting in randomized controlled trials of major depressive disorder treatments in adolescents: a systematic scoping review protocol

|                               |                                                                                                                                                                                                                                                                                                                                                                                                                                                                                                                                                                                                                                                                                                                                                     |
|-------------------------------|-----------------------------------------------------------------------------------------------------------------------------------------------------------------------------------------------------------------------------------------------------------------------------------------------------------------------------------------------------------------------------------------------------------------------------------------------------------------------------------------------------------------------------------------------------------------------------------------------------------------------------------------------------------------------------------------------------------------------------------------------------|
| Journal:                      | <i>BMJ Open</i>                                                                                                                                                                                                                                                                                                                                                                                                                                                                                                                                                                                                                                                                                                                                     |
| Manuscript ID                 | bmjopen-2018-024191                                                                                                                                                                                                                                                                                                                                                                                                                                                                                                                                                                                                                                                                                                                                 |
| Article Type:                 | Protocol                                                                                                                                                                                                                                                                                                                                                                                                                                                                                                                                                                                                                                                                                                                                            |
| Date Submitted by the Author: | 14-May-2018                                                                                                                                                                                                                                                                                                                                                                                                                                                                                                                                                                                                                                                                                                                                         |
| Complete List of Authors:     | Monsour, Andrea; The Hospital for Sick Children Research Institute, Child Health Evaluative Sciences<br>Mew, Emma; The Hospital for Sick Children Research Institute, Child Health Evaluative Sciences<br>Szatmari, Peter; The Hospital for Sick Children; Centre for Addiction and Mental Health, Centre for Child and Youth Depression<br>Patel, Sagar ; The Hospital for Sick Children Research Institute , Child Health Evaluative Sciences<br>Saeed, Leena ; The Hospital for Sick Children Research Institute , Child Health Evaluative Sciences<br>Offringa, Martin; The Hospital for Sick Children Research Institute, Child Health Evaluative Sciences<br>Butcher, Nancy; The Hospital for Sick Children, Child Health Evaluative Sciences |
| Keywords:                     | Major depressive disorder, Adolescent, Clinical trial, Outcome reporting, Core outcome set, Systematic scoping review                                                                                                                                                                                                                                                                                                                                                                                                                                                                                                                                                                                                                               |
|                               |                                                                                                                                                                                                                                                                                                                                                                                                                                                                                                                                                                                                                                                                                                                                                     |

SCHOLARONE™  
Manuscripts

# Outcome reporting in randomized controlled trials of major depressive disorder treatments in adolescents: a systematic scoping review protocol

Andrea Monsour, MPH,<sup>1</sup> Emma J. Mew, MPH,<sup>1</sup> Peter Szatmari, MD,<sup>2</sup> Sagar Patel, HBSc,<sup>1</sup> Leena Saeed, BSc,<sup>1</sup> Martin Offringa, MD PhD,<sup>1</sup> Nancy J. Butcher, PhD<sup>1</sup>

## Author affiliations

<sup>1</sup>Child Health Evaluative Sciences, The Hospital for Sick Children Research Institute, Toronto, Ontario, Canada

<sup>2</sup>The Hospital for Sick Children, Cundill Centre for Child and Youth Depression at the Centre for Addiction and Mental Health, and Department of Psychiatry, University of Toronto

## Author emails

AM: andrea.monsour@sickkids.ca

EJM: emma.mew@sickkids.ca

PS: peter.szatmari@sickkids.ca

SP: sagarb.patel@mail.utoronto.ca

LS: leena.saeed@sickkids.ca

MO: martin.offringa@sickkids.ca

NJB: nancy.butcher@sickkids.ca

## Corresponding author

Dr. Nancy Butcher

The Hospital for Sick Children, Peter Gilgan Centre for Research and Learning

686 Bay Street, 11<sup>th</sup> floor, South 16, Toronto, Ontario, M5G 0A4

Tel: 416-813-7654 ext 309650

Email: nancy.butcher@sickkids.ca

## Keywords

major depressive disorder, adolescent, clinical trial, outcome reporting, core outcome set, systematic scoping review

**Text Word Count:** 1689

**Abstract Word Count:** 267

**Tables:** 0

**Figures:** 0

## ABSTRACT

**Introduction:** Major depressive disorder (MDD) is a common mental health condition in adolescents. Randomized clinical trials (RCTs) are the gold-standard for assessing the safety and efficacy of interventions in this population. Heterogeneity in the outcomes measured and reported between RCTs limits the ability to compare, contrast, and combine trial results in a clinically meaningful way. There is currently no core outcome set (COS) available for use in RCTs evaluating interventions in adolescents with MDD. We will conduct a systematic scoping review to assess the variability of outcomes reported in RCTs in adolescents with MDD and to inform the development of a COS.

**Methods and analysis:** We will apply methods based on the Joanna Briggs Institute scoping review methods manual. RCTs evaluating any treatment intervention for adolescent MDD published in the last ten years will be located using an electronic bibliographic database search (MEDLINE, PsycINFO, and Cochrane Central Register of Controlled Trials). Title and abstract screening, full-text screening, and data charting of eligible studies will be performed in duplicate. Outcomes identified will be mapped to an outcome domain framework. Data analysis will include summary statistics of the characteristics of the included trials and outcomes.

**Ethics and dissemination:** The results of this review will inform the development of a COS for adolescent MDD. The development and implementation of a COS for RCTs evaluating interventions in adolescents with MDD promises to help reduce variability in trial outcome selection, definition, measurement, and reporting, ultimately facilitating evidence synthesis that will help to identify best treatment practices for adolescents with MDD.

**Registration details:** This protocol was registered prospectively with the Open Science Framework (<https://osf.io/xjz9u/>).

### Strengths and limitations of this study

- Our systematic methods are based on the Joanna Briggs Institute scoping review methods manual and the guidelines provided by the Core Outcome Measures in Effectiveness Trials (COMET) Initiative.
- We will employ a rigorous search strategy using validated search filters developed with a research librarian.
- We will only include studies published in English language within the past ten years.
- As this is a scoping review to collect reported outcomes, quality of the evidence and risk of bias of included studies will not be systematically assessed.

## INTRODUCTION

Major depressive disorder (MDD) is a debilitating mental health condition that affects more than 300 million people worldwide.<sup>1</sup> MDD has been estimated to affect approximately 5% of adolescents,<sup>2,3</sup> and can profoundly impact psychosocial, family, and academic functioning.<sup>2,4</sup> Adolescents with MDD are at increased risk of suicide as well as depressive disorders and poor functional outcomes in adulthood.<sup>5-9</sup> Randomized clinical trials (RCTs) remain the gold-standard for assessing interventions in this population and are essential given that the safety and efficacy profile of treatment interventions in adolescents may differ from the profiles observed in adult studies.<sup>10</sup> For example, tricyclic antidepressants, an effective pharmacological treatment for MDD in adults, demonstrated no efficacy in adolescents.<sup>11</sup> Unfortunately, recent meta-analyses of adolescent MDD trials have been characterized by high heterogeneity in reported outcome data,<sup>12,13</sup> which limits data synthesis and the interpretation and usability of trial results for clinical decision making practices.

Variability in the selection and reporting of trial outcomes is a well-recognized challenge in biomedical research.<sup>14-17</sup> This contributes to considerable avoidable waste of the financial and human resources invested in these trials, including participant time and effort.<sup>18</sup> One proposed solution to this is the development and implementation of core outcome sets (COS).<sup>14-16</sup> A COS is an agreed minimum set of outcomes, which provide a recommendation of what should be measured within all trials in a specific disease area.<sup>19</sup> The Core Outcome Measures in Effectiveness Trials (COMET) Initiative<sup>19</sup> currently houses over 1000 references related to COS across a wide variety of health conditions. However, to date no COS for use in studies of adolescents with MDD exists, and evidence-users are left with a lack of consensus and variability in the field with respect to outcome selection, definition, measurement, and reporting.

This paper outlines the methods for a systematic scoping review that will represent the first step of the development of a COS for RCTs evaluating interventions in adolescent MDD.<sup>20</sup> The objective of this scoping review is to identify and characterize outcomes reported in published adolescent MDD trials. These results will be used to evaluate the extent of outcome heterogeneity in RCTs in adolescents with MDD, and will provide an initial list of outcomes to consider in a COS for this population.

## METHODS AND ANALYSIS

### Study design

A systematic scoping review is the most appropriate approach for addressing the aim of this study, as it uses a knowledge synthesis approach that maps concepts underpinning a research area and the main sources and types of evidence available.<sup>21-23</sup> This protocol is based on the recommendations provided by the Joanna Briggs Institute scoping review methods manual<sup>21</sup> and follows recommended systematic methods.<sup>24</sup>

### Protocol

This protocol was drafted in accordance with the Preferred Reporting Items for Systematic Reviews and Meta-Analysis for Protocols (PRISMA-P) reporting guideline (online supplementary appendix A).<sup>25</sup> The final scoping review will follow the Preferred Reporting Items for Systematic Reviews and Meta-Analysis extension for Scoping Reviews (PRISMA-ScR) if available upon publication.<sup>26</sup>

1  
2  
3 This project was registered with the COMET Initiative on 26 February 2018.<sup>20</sup> The protocol  
4 preprint was registered prospectively with the Open Science Framework on 8 May 2018.<sup>27</sup>  
5 Important protocol amendments, if made, will be documented on this webpage.<sup>27</sup>  
6

### 7 **Eligibility criteria**

8 The eligibility criteria for the included studies are based on the PICOT framework:<sup>28</sup>  
9

10 Population (P): Adolescents aged 12 to 18 years<sup>29</sup> with a clinical diagnosis of major depressive  
11 disorder, as defined by the diagnostic criteria in the Diagnostic and Statistical Manual of Mental  
12 Disorders<sup>30</sup> will be eligible. Adolescents with co-morbid psychiatric conditions will be included.  
13

14 Intervention (I): All treatment interventions for MDD (i.e., pharmacological and non-  
15 pharmacological) will be eligible.  
16  
17

18 Comparators (C): There will be no comparator restrictions.  
19

20 Outcomes (O): There will be no outcome restrictions.  
21

22 Timing (T): Studies will be eligible if published within the last ten years (2008 – 2017 inclusive)  
23 to capture recently conducted and reported trials. There will be no restrictions on duration of  
24 follow-up after intervention.  
25

26 Only RCTs published in English will be included for feasibility. Trials from any country or setting  
27 will be eligible. Pilot and feasibility RCTs will be eligible for inclusion. Interim reports of a trial for  
28 which the final trial report was included will be excluded. RCTs including any patient over 18  
29 years of age without a subgroup analysis containing children aged 12 to 18 years will be  
30 excluded.<sup>31</sup>  
31  
32

### 33 **Information sources and search strategy**

34 We will locate studies for inclusion using an electronic bibliographic database search applied to  
35 MEDLINE, PsycINFO, and the Cochrane Central Register of Controlled Trials.  
36

37 The search strategy was developed in consultation from an experienced research librarian  
38 (TAW) (online supplementary appendix B). Search strategy development was informed by an  
39 analysis of the MeSH terms and text words contained in the title, abstract, and keyword  
40 headings from a sample of eligible articles identified from informal literature searching.<sup>32-35</sup> The  
41 MEDLINE and PsycINFO search strategies use validated search filters to identify RCTs.<sup>36</sup>  
42 Trained team members (AM, LS) will perform the final searches and de-duplicate the results  
43 using EndNote version X8.<sup>37</sup>  
44  
45

### 46 **Source selection**

#### 47 **Initial Screening**

48 Titles and abstracts will first be screened to assess eligibility. Two trained reviewers will screen  
49 independently and in duplicate. All discrepancies will be resolved through discussion with a third  
50 reviewer. The two reviewers will complete training and reliability testing on a random sample of  
51 the search results (e.g., 100 candidate articles) until sufficient inter-rater reliability is achieved  
52 (e.g., ≥80% agreement). Included studies will move to full-text screening.  
53  
54

#### 55 **Full-text screening**

56  
57  
58  
59  
60

1  
2  
3 Two trained reviewers will screen the full-text of studies for eligibility independently and in  
4 duplicate. All discrepancies will be resolved through discussion with a third reviewer. The  
5 reviewers will complete training and reliability testing on a random sample of documents  
6 included from initial screening until sufficient inter-rater reliability is achieved (e.g., ≥80%  
7 agreement). Reasons for study exclusion will be logged using REDCap (Research Electronic  
8 Data Capture) data management software.<sup>38</sup> When necessary, we will contact authors to clarify  
9 eligibility criteria. Included studies will move to data charting.  
10

### 11 **Data charting**

12 All studies included from full-text screening will undergo data charting in duplicate by two trained  
13 reviewers using a standardized charting form developed using REDCap data management  
14 software.<sup>38</sup> Disagreements will be resolved through a third team member, when necessary.  
15

16  
17 The following data will be charted: publication identifiers (e.g., journal, year, first author), study  
18 characteristics (e.g., participant age group, total sample size, intervention type, length of follow-  
19 up, region(s) of study setting, and funding source type). We will chart the following data for each  
20 outcome: definition of outcome, definition of meaningful change, outcome type (e.g., single vs.  
21 composite), and outcome measurement instrument(s) used. We note that other terms for  
22 outcome may be used in the included studies, such as endpoint or outcome measure.<sup>39</sup> In the  
23 context of adolescent MDD, an example of an outcome would be 'severity of MDD', and an  
24 example of an outcome measurement instrument would be the 'Children's Depression Rating  
25 Scale-Revised'.<sup>40</sup> We will also chart results on which outcomes were categorized as primary,  
26 secondary, or not specified. We will classify an outcome as a 'primary outcome' when studies  
27 explicitly report at least one of the following: (1) a study outcome is explicitly referred to as a  
28 'primary outcome'; (2) outcome data was used to calculate sample size; or (3) study objective  
29 explicitly included examining an intervention effect on that outcome.<sup>31</sup> Notably, multiple primary  
30 outcomes are commonly reported in depression RCTs.<sup>41</sup>  
31

32  
33 After data charting, the identified outcomes will be synthesized and grouped through  
34 assignment to thematic 'outcome terms', as appropriate, consistent with the development of  
35 other COS.<sup>31 42</sup> For example, the outcomes 'psychosocial improvement' and 'level of functioning  
36 at school, home, and in the community' could be grouped under the outcome term 'social  
37 functioning'.<sup>33 43</sup> For composite outcomes, each individual component of the composite  
38 outcome, if reported, will be grouped under its appropriate outcome term.<sup>31</sup> All outcome terms  
39 will then be assigned (herein referred to as 'outcome mapping') to an existing or adapted  
40 outcome domain framework e.g., as those described by COMET Handbook and elsewhere<sup>42 44</sup>  
41 in consultation with child psychiatrists and methodological experts.  
42

### 43 **Pilot testing**

44 We will pilot the full-text review and data charting forms on a sample of ten relevant documents  
45 before full-text review begins. We will also conduct a preliminary analysis to pilot the data  
46 summary process.  
47

### 48 **Risk of bias assessment or quality appraisal**

49 As this is a scoping review, we will not conduct risk of bias assessments or quality appraisals of  
50 included sources. This approach is consistent with the Joanna Briggs Institute manual.<sup>21</sup>  
51

### 52 **Synthesis of results**

53 Data analysis will include quantitative measures (counts and frequencies) of study and outcome  
54 characteristics (e.g., number of included papers, total number of outcomes, total number of  
55 outcome measurement instruments, median number of outcomes per study). Tables will be  
56  
57  
58  
59



used to display e.g., the characteristics of the included studies and outcomes, as well as the variation in outcome definitions. We will present the results of mapping outcome terms using, for example, a modified outcome matrix model inspired by the Outcome Reporting for Brief Intervention Trials (ORBIT) project<sup>45</sup> and adopted in other COS developments.<sup>31</sup>

## DISCUSSION

This review will identify and map all outcomes reported in recent RCTs for the treatment of adolescent MDD. This comprehensive list of outcomes will provide the basis for the development of a COS for adolescent MDD. Methods outlining the development of the COS will be published separately.

### Implications

The conduct of high-quality clinical trials that measure meaningful and clearly defined outcomes that facilitate evidence synthesis efforts is critical to identify the best treatments for adolescents with MDD. Research findings on adolescent MDD may be difficult to interpret, replicate, or include in evidence synthesis efforts due, in part, from the heterogeneity of the outcomes measured and reported in clinical trials. This systematic scoping review will identify the extent of the outcome heterogeneity in RCTs in adolescents with MDD and will help inform the development of a COS. The development and uptake of a COS promises to help improve the standardization of outcome selection, and in turn, improve clinical decision-making and reduce research waste.<sup>42 46</sup>

### Dissemination

The results of this scoping review will be published in a peer-review journal. We will circulate the publication to the COMET Initiative and other relevant mailing lists and social media platforms.

### ETHICS

This scoping review does not require ethical approval.

### AUTHOR CONTRIBUTIONS

NJB, MO, and PS were responsible for study conception. AM, EJM, and NJB were responsible for study design. AM, EJM, SP, LS and NJB drafted the manuscript. All authors critically reviewed and provided feedback on the study design and manuscript. All authors read and approved the protocol prior to its submission.

### FUNDING STATEMENT

This research received no specific grant from any funding agency in the public, commercial or not-for-profit sectors.

### COMPETING INTERESTS

The authors declare no conflicts of interest.

### ACKNOWLEDGEMENTS

The authors wish to thank Tamsin Adams-Webber (TAW) for her assistance in developing the electronic bibliographic database search strategy.



## REFERENCES

1. World Health Organization. Depression and other common mental disorders: global health estimates. Geneva: World Health Organization, 2017.
2. Thapar A, Collishaw S, Pine DS, et al. Depression in adolescence. *Lancet* 2012;379:1056-67.
3. Merikangas KR, Nakamura EF, Kessler RC. Epidemiology of mental disorders in children and adolescents. *Dialogues Clin Neurosci* 2009;11:7-20.
4. Wagner S, Muller C, Helmreich I, et al. A meta-analysis of cognitive functions in children and adolescents with major depressive disorder. *Eur Child Adolesc Psychiatry* 2015;24:5-19.
5. Weissman MM, Wolk S, Goldstein RB, et al. Depressed adolescents grown up. *JAMA* 1999;281:1707-13.
6. Copeland WE, Wolke D, Shanahan L, et al. Adult functional outcomes of common childhood psychiatric problems: a prospective, longitudinal study. *JAMA Psychiatry* 2015;72:892-9.
7. Rao U, Weissman MM, Martin JA, et al. Childhood depression and risk of suicide: a preliminary report of a longitudinal study. *J Am Acad Child Adolesc Psychiatry* 1993;32:21-7.
8. Goren JL. Antidepressants use in pediatric populations. *Expert Opin Drug Saf* 2008;7:223-5.
9. Pine DS, Cohen P, Gurley D, et al. The risk for early-adulthood anxiety and depressive disorders in adolescents with anxiety and depressive disorders. *Arch Gen Psychiatry* 1998;55:56-64.
10. Emslie GJ, Mayes TL, Ruberu M. Continuation and maintenance therapy of early-onset major depressive disorder. *Paediatr Drugs* 2005;7:203-17.
11. Arroll B, Macgillivray S, Ogston S, et al. Efficacy and tolerability of tricyclic antidepressants and SSRIs compared with placebo for treatment of depression in primary care: a meta-analysis. *Ann Fam Med* 2005;3:449-56.
12. Cox GR, Callahan P, Churchill R, et al. Psychological therapies versus antidepressant medication, alone and in combination for depression in children and adolescents. *Cochrane Database Syst Rev* 2014:CD008324.
13. Hazell P, Mirzaie M. Tricyclic drugs for depression in children and adolescents. *Cochrane Database Syst Rev* 2013:CD002317.
14. Idzerda L, Rader T, Tugwell P, et al. Can we decide which outcomes should be measured in every clinical trial? A scoping review of the existing conceptual frameworks and processes to develop core outcome sets. *J Rheumatol* 2014;41:986-93.
15. Williamson P, Altman D, Blazeby J, et al. Driving up the quality and relevance of research through the use of agreed core outcomes. *J Health Serv Res Policy* 2012;17:1-2.
16. Gorst SL, Gargon E, Clarke M, et al. Choosing important health outcomes for comparative effectiveness research: an updated review and user survey. *PLoS One* 2016;11:e0146444.
17. Macleod MR, Michie S, Roberts I, et al. Biomedical research: increasing value, reducing waste. *Lancet* 2014;383:101-04.
18. Chalmers I, Glasziou P. Avoidable waste in the production and reporting of research evidence. *Lancet* 2009;374:86-89.
19. COMET Initiative Website. 2018. <http://www.comet-initiative.org/> (accessed 20 April 2018).
20. Core set of outcomes for adolescents with major depressive disorder: a tool of standardized outcomes for clinical research and practice. COMET Initiative. 2018. <http://www.comet-initiative.org/studies/details/1122> (accessed 20 April 2018).
21. The Joanna Briggs Institute. Reviewers' Manual 2015 Methodology for JBI Scoping Reviews, 2015.
22. Colquhoun HL, Levac D, O'Brien KK, et al. Scoping reviews: time for clarity in definition, methods, and reporting. *J Clin Epidemiol* 2014;67:1291-4.

23. Tricco AC, Lillie E, Zarin W, et al. A scoping review on the conduct and reporting of scoping reviews. *BMC Med Res Methodol* 2016;16:15.
24. Peters MD, Godfrey CM, Khalil H, et al. Guidance for conducting systematic scoping reviews. *Int J Evid Based Healthc* 2015;13:141-6.
25. Moher D, Shamseer L, Clarke M, et al. Preferred reporting items for systematic review and meta-analysis protocols (PRISMA-P) 2015 statement. *Syst Rev* 2015;4:1.
26. Preferred Reporting Items for Systematic Reviews and Meta-Analysis extension for Scoping Reviews (PRISMA-ScR). EQUATOR Network. 2015. <http://www.equator-network.org/library/reporting-guidelines-under-development/#55> (accessed 25 April 2018).
27. Monsour A, Mew EJ, Szatmari P, et al. Outcome reporting in randomized controlled trials of major depressive disorder treatments in adolescents: a systematic scoping review protocol. 2018. <https://osf.io/xjz9u/> (accessed 14 May 2018).
28. Thabane L, Thomas T, Ye C, et al. Posing the research question: not so simple. *Can J Anaesth* 2008;56:71.
29. Williams K, Thomson D, Seto I, et al. Standard 6: age groups for pediatric trials. *Pediatrics* 2012;129 Suppl 3:S153-60.
30. American Psychiatric Association. Diagnostic and statistical manual of mental disorders, fifth edition. Arlington, VA: American Psychiatric Association 2013.
31. Hall NJ, Kapadia MZ, Eaton S, et al. Outcome reporting in randomised controlled trials and meta-analyses of appendicitis treatments in children: a systematic review. *Trials* 2015;16:275.
32. Brent D, Emslie G, Clarke G, et al. Switching to another SSRI or to venlafaxine with or without cognitive behavioral therapy for adolescents with SSRI-resistant depression: the TORDIA randomized controlled trial. *JAMA* 2008;299:901-13.
33. Goodyer IM, Dubicka B, Wilkinson P, et al. A randomised controlled trial of cognitive behaviour therapy in adolescents with major depression treated by selective serotonin reuptake inhibitors. The ADAPT trial. *Health Technol Assess* 2008;12:iii-iv, ix-60.
34. Jacobs RH, Watkins ER, Peters AT, et al. Targeting Ruminative Thinking in Adolescents at Risk for Depressive Relapse: Rumination-Focused Cognitive Behavior Therapy in a Pilot Randomized Controlled Trial with Resting State fMRI. *PLoS One* 2016;11:e0163952.
35. March J, Silva S, Vitiello B. The Treatment for Adolescents With Depression Study (TADS). *J Am Acad Child Adolesc Psychiatry* 2006;45:1393-403.
36. Health Information Research Unit. Hedges Health Information Research Unit: Evidence-Based Health Informatics. 2016. [https://hiru.mcmaster.ca/hiru/HIRU\\_Hedges\\_home.aspx](https://hiru.mcmaster.ca/hiru/HIRU_Hedges_home.aspx) (accessed 11 May 2018).
37. Clarivate Analytics. EndNote X8. 2016. <http://endnote.com/product-details>
38. Harris PA, Taylor R, Thielke R, et al. Research Electronic Data Capture (REDCap) - A metadata-driven methodology and workflow process for providing translational research informatics support. *J Biomed Inform* 2009;42:377-81.
39. Boers M, Kirwan JR, Wells G, et al. Developing core outcome measurement sets for clinical trials: OMERACT filter 2.0. *J Clin Epidemiol* 2014;67:745-53.
40. Mayes T, Bernstein I, L Haley C, et al. Psychometric Properties of the Children's Depression Rating Scale-Revised in Adolescents 2010:513-6.
41. Tyler KM, Normand SL, Horton NJ. The use and abuse of multiple outcomes in randomized controlled depression trials. *Contemp Clin Trials* 2011;32:299-304.
42. Williamson PR, Altman DG, Bagley H, et al. The COMET Handbook: version 1.0. *Trials* 2017;18:280.
43. Treatment for Adolescents with Depression Study Team. Treatment for Adolescents with Depression Study (TADS): Rationale, design, and methods. *J Am Acad Child Adolesc Psychiatry* 2003;42:531-42.

- 1
- 2
- 3 44. ICHOM Standard Set for Depression & Anxiety Working Group. ICHOM Depression and
- 4 Anxiety Data Collection Reference Guide. 2.3.1 ed. London, UK: ICHOM, 2017:63.
- 5 45. Kirkham JJ, Dwan KM, Altman DG, et al. The impact of outcome reporting bias in
- 6 randomised controlled trials on a cohort of systematic reviews. *BMJ* 2010;340:c365.
- 7 46. Glasziou P, Altman DG, Bossuyt P, et al. Reducing waste from incomplete or unusable
- 8 reports of biomedical research. *Lancet* 2014;383:267-76.
- 9

10  
11  
12  
13  
14  
15  
16  
17  
18  
19  
20  
21  
22  
23  
24  
25  
26  
27  
28  
29  
30  
31  
32  
33  
34  
35  
36  
37  
38  
39  
40  
41  
42  
43  
44  
45  
46  
47  
48  
49  
50  
51  
52  
53  
54  
55  
56  
57  
58  
59  
60

For peer review only

## APPENDIX A

eTable 1. PRISMA-P checklist.<sup>1</sup>

| Section and topic                 | Item No | Checklist item                                                                                                                                                                                                                | Location in manuscript                                                                                                                                                                                                                   |
|-----------------------------------|---------|-------------------------------------------------------------------------------------------------------------------------------------------------------------------------------------------------------------------------------|------------------------------------------------------------------------------------------------------------------------------------------------------------------------------------------------------------------------------------------|
| <b>ADMINISTRATIVE INFORMATION</b> |         |                                                                                                                                                                                                                               |                                                                                                                                                                                                                                          |
| Title:                            |         |                                                                                                                                                                                                                               |                                                                                                                                                                                                                                          |
| Identification                    | 1a      | Identify the report as a protocol of a systematic review                                                                                                                                                                      | Title                                                                                                                                                                                                                                    |
| Update                            | 1b      | If the protocol is for an update of a previous systematic review, identify as such                                                                                                                                            | Not applicable, and therefore, not stated                                                                                                                                                                                                |
| Registration                      | 2       | If registered, provide the name of the registry (such as PROSPERO) and registration number                                                                                                                                    | URL provided for Open Science Framework registration in abstract and in the section entitled "Protocol" under the heading "METHODS AND ANALYSIS"                                                                                         |
| Authors:                          |         |                                                                                                                                                                                                                               |                                                                                                                                                                                                                                          |
| Contact                           | 3a      | Provide name, institutional affiliation, e-mail address of all protocol authors; provide physical mailing address of corresponding author                                                                                     | Cover page                                                                                                                                                                                                                               |
| Contributions                     | 3b      | Describe contributions of protocol authors and identify the guarantor of the review                                                                                                                                           | Under heading "AUTHORS CONTRIBUTIONS"                                                                                                                                                                                                    |
| Amendments                        | 4       | If the protocol represents an amendment of a previously completed or published protocol, identify as such and list changes; otherwise, state plan for documenting important protocol amendments                               | Under the section entitled "Protocol" under the heading "METHODS AND ANALYSIS"                                                                                                                                                           |
| Support:                          |         |                                                                                                                                                                                                                               |                                                                                                                                                                                                                                          |
| Sources                           | 5a      | Indicate sources of financial or other support for the review                                                                                                                                                                 | Under heading "FUNDING STATEMENT"                                                                                                                                                                                                        |
| Sponsor                           | 5b      | Provide name for the review funder and/or sponsor                                                                                                                                                                             | Under heading "FUNDING STATEMENT"                                                                                                                                                                                                        |
| Role of sponsor or funder         | 5c      | Describe roles of funder(s), sponsor(s), and/or institution(s), if any, in developing the protocol                                                                                                                            | None; not applicable                                                                                                                                                                                                                     |
| <b>INTRODUCTION</b>               |         |                                                                                                                                                                                                                               |                                                                                                                                                                                                                                          |
| Rationale                         | 6       | Describe the rationale for the review in the context of what is already known                                                                                                                                                 | Under "INTRODUCTION"                                                                                                                                                                                                                     |
| Objectives                        | 7       | Provide an explicit statement of the question(s) the review will address with reference to participants, interventions, comparators, and outcomes (PICO)                                                                      | Objectives provided in "INTRODUCTION"                                                                                                                                                                                                    |
| <b>METHODS</b>                    |         |                                                                                                                                                                                                                               |                                                                                                                                                                                                                                          |
| Eligibility criteria              | 8       | Specify the study characteristics (such as PICO, study design, setting, time frame) and report characteristics (such as years considered, language, publication status) to be used as criteria for eligibility for the review | PICOT provided under section "Eligibility criteria" under the heading "METHODS AND ANALYSIS"                                                                                                                                             |
| Information sources               | 9       | Describe all intended information sources (such as electronic databases, contact with study authors, trial registers or other grey literature sources) with planned dates of coverage                                         | Date restrictions provided under section "Eligibility criteria" under the heading "METHODS AND ANALYSIS". Information sources described under section "Information sources and search strategy" under the heading "METHODS AND ANALYSIS" |
| Search strategy                   | 10      | Present draft of search strategy to be used                                                                                                                                                                                   | Final search strategies provided in Appendix                                                                                                                                                                                             |

|                                    |     |                                                                                                                                                                                                                                                  |                                                                                                                                                                                             |
|------------------------------------|-----|--------------------------------------------------------------------------------------------------------------------------------------------------------------------------------------------------------------------------------------------------|---------------------------------------------------------------------------------------------------------------------------------------------------------------------------------------------|
|                                    |     | for at least one electronic database, including planned limits, such that it could be repeated                                                                                                                                                   | B                                                                                                                                                                                           |
| Study records:                     |     |                                                                                                                                                                                                                                                  |                                                                                                                                                                                             |
| Data management                    | 11a | Describe the mechanism(s) that will be used to manage records and data throughout the review                                                                                                                                                     | Provided under the sub-section "Full-text screening" under the section "Source selection" and provided under the section and "Data charting", both under the heading "METHODS AND ANALYSIS" |
| Selection process                  | 11b | State the process that will be used for selecting studies (such as two independent reviewers) through each phase of the review (that is, screening, eligibility and inclusion in meta-analysis)                                                  | Provided under the sections "Source selection" and "Data charting" under the heading "METHODS AND ANALYSIS"                                                                                 |
| Data collection process            | 11c | Describe planned method of extracting data from reports (such as piloting forms, done independently, in duplicate), any processes for obtaining and confirming data from investigators                                                           | Provided under the sections "Data charting" and "Pilot testing" under the heading "METHODS AND ANALYSIS"                                                                                    |
| Data items                         | 12  | List and define all variables for which data will be sought (such as PICO items, funding sources), any pre-planned data assumptions and simplifications                                                                                          | Provided under the section "Data charting" under the heading "METHODS AND ANALYSIS"                                                                                                         |
| Outcomes and prioritization        | 13  | List and define all outcomes for which data will be sought, including prioritization of main and additional outcomes, with rationale                                                                                                             | Provided under the section "Data charting" under the heading "METHODS AND ANALYSIS"                                                                                                         |
| Risk of bias in individual studies | 14  | Describe anticipated methods for assessing risk of bias of individual studies, including whether this will be done at the outcome or study level, or both; state how this information will be used in data synthesis                             | Not applicable; this is a scoping review. However, explanation provided under section "Risk of bias assessment or quality appraisal" under the heading "METHODS AND ANALYSIS"               |
| Data synthesis                     | 15a | Describe criteria under which study data will be quantitatively synthesized                                                                                                                                                                      | Provided under section "Synthesis of results" under heading "METHODS AND ANALYSIS"                                                                                                          |
|                                    | 15b | If data are appropriate for quantitative synthesis, describe planned summary measures, methods of handling data and methods of combining data from studies, including any planned exploration of consistency (such as $I^2$ , Kendall's $\tau$ ) | Not applicable                                                                                                                                                                              |
|                                    | 15c | Describe any proposed additional analyses (such as sensitivity or subgroup analyses, meta-regression)                                                                                                                                            | Not applicable                                                                                                                                                                              |
|                                    | 15d | If quantitative synthesis is not appropriate, describe the type of summary planned                                                                                                                                                               | Provided under section "Synthesis of results" under heading "METHODS AND ANALYSIS"                                                                                                          |
| Meta-bias(es)                      | 16  | Specify any planned assessment of meta-bias(es) (such as publication bias across studies, selective reporting within studies)                                                                                                                    | Not applicable                                                                                                                                                                              |
| Confidence in cumulative evidence  | 17  | Describe how the strength of the body of evidence will be assessed (such as GRADE)                                                                                                                                                               | Not applicable                                                                                                                                                                              |

1. Moher D, Shamseer L, Clarke M, et al. Preferred reporting items for systematic review and meta-analysis protocols (PRISMA-P) 2015 statement. *Syst Rev* 2015;4:1.

**APPENDIX B****eTable 2. Search strategy designed for the Ovid Medical Literature Analysis and Retrieval System Online (MEDLINE)® Epub Ahead of Print, In-Process & Other Non-Indexed Citations, Ovid MEDLINE® Daily and Ovid MEDLINE® 1946 to Present database.**

| Search term                                                                                                                                                                                                                                                                                                                  |
|------------------------------------------------------------------------------------------------------------------------------------------------------------------------------------------------------------------------------------------------------------------------------------------------------------------------------|
| 1. depressive disorder/ or depressive disorder, major/                                                                                                                                                                                                                                                                       |
| 2. (depressive disorder* or clinical depression* or unipolar depression* or major depression* or depressive disease* or depressive episode* or depressive illness* or depressive state* or depressive syndrome* or endogenous depression* or major depressive episode* or mental depression* or neurotic depression*).tw,kf. |
| 3. 1 or 2                                                                                                                                                                                                                                                                                                                    |
| 4. adolescent/                                                                                                                                                                                                                                                                                                               |
| 5. (adolescen* or teen* or girl or girls or boy or boys or youth* or peadiatric* or paediatric* or pediatric* or preadolescen* or preteen* or secondary school* or high school* or primary school* or elementary school*).tw,kf.                                                                                             |
| 6. 4 or 5                                                                                                                                                                                                                                                                                                                    |
| 7. 3 and 6                                                                                                                                                                                                                                                                                                                   |
| 8. randomized controlled trial.pt. or randomized.mp. or placebo.mp.                                                                                                                                                                                                                                                          |
| 9. 7 and 8                                                                                                                                                                                                                                                                                                                   |
| 10. limit 9 to yr="2008 - 2017"                                                                                                                                                                                                                                                                                              |
| 11. remove duplicates from 10                                                                                                                                                                                                                                                                                                |

Date of search: 9 May 2018. Line 8 taken verbatim from the Health Information Research Unit (HiRU) RCT search filter<sup>1</sup> (Sensitivity=96%; Specificity=95%; Precision=39%; Accuracy=95%).



**eTable 3. Search strategy designed for the Ovid PsycINFO® 1967 to April Week 5 2018 database.**

| Search term                                                                                                                                                                                                                                                                                                                  |
|------------------------------------------------------------------------------------------------------------------------------------------------------------------------------------------------------------------------------------------------------------------------------------------------------------------------------|
| 1. major depression/                                                                                                                                                                                                                                                                                                         |
| 2. (depressive disorder* or clinical depression* or unipolar depression* or major depression* or depressive disease* or depressive episode* or depressive illness* or depressive state* or depressive syndrome* or endogenous depression* or major depressive episode* or mental depression* or neurotic depression*).tw,id. |
| 3. 1 or 2                                                                                                                                                                                                                                                                                                                    |
| 4. (adolescen* or teen* or girl or girls or boy or boys or youth* or paediatric* or paediatric* or pediatric* or preadolescen* or preteen* or secondary school* or high school* or primary school* or elementary school*).mp.                                                                                                |
| 5. 3 and 4                                                                                                                                                                                                                                                                                                                   |
| 6. double-blind.tw. or random* assigned.tw. or control.tw.                                                                                                                                                                                                                                                                   |
| 7. 5 and 6                                                                                                                                                                                                                                                                                                                   |
| 8. limit 7 to yr="2008 - 2017"                                                                                                                                                                                                                                                                                               |
| 9. remove duplicates from 8                                                                                                                                                                                                                                                                                                  |

Date of search: 9 May 2018. Line 6 taken verbatim from the Health Information Research Unit (HiRU) RCT search filter<sup>1</sup> (Sensitivity=79%; Specificity=80%; Precision=13%; Accuracy – 80%).



**eTable 4. Search strategy designed for Ovid EBM Reviews - Cochrane Central Register of Controlled Trials March 2018 database.**

| Search term                                                                                                                                                                                                                                                                                                                  |
|------------------------------------------------------------------------------------------------------------------------------------------------------------------------------------------------------------------------------------------------------------------------------------------------------------------------------|
| 1. depressive disorder/ or depressive disorder, major/                                                                                                                                                                                                                                                                       |
| 2. (depressive disorder* or clinical depression* or unipolar depression* or major depression* or depressive disease* or depressive episode* or depressive illness* or depressive state* or depressive syndrome* or endogenous depression* or major depressive episode* or mental depression* or neurotic depression*).tw,kw. |
| 3. 1 or 2                                                                                                                                                                                                                                                                                                                    |
| 4. adolescent/                                                                                                                                                                                                                                                                                                               |
| 5. (adolescen* or teen* or girl or girls or boy or boys or youth* or paediatric* or paediatric* or pediatric* or preadolescen* or preteen* or secondary school* or high school* or primary school* or elementary school*).tw,kw.                                                                                             |
| 6. 4 or 5                                                                                                                                                                                                                                                                                                                    |
| 7. 3 and 6                                                                                                                                                                                                                                                                                                                   |
| 8. limit 7 to yr="2008 - 2017"                                                                                                                                                                                                                                                                                               |
| 9. remove duplicates from 8                                                                                                                                                                                                                                                                                                  |

Date of search: 9 May 2018

**REFERENCES**

1. Health Information Research Unit. Hedges. Health Information Research Unit: Evidence-Based Health Informatics. 2016. [https://hiru.mcmaster.ca/hiru/HIRU\\_Hedges\\_home.aspx](https://hiru.mcmaster.ca/hiru/HIRU_Hedges_home.aspx) (accessed 11 May 2018).

# BMJ Open

## Outcomes reported in randomized controlled trials of major depressive disorder treatments in adolescents: a systematic scoping review protocol

|                                 |                                                                                                                                                                                                                                                                                                                                                                                                                                                                                                                                                                                                                                                                                                                                                                                |
|---------------------------------|--------------------------------------------------------------------------------------------------------------------------------------------------------------------------------------------------------------------------------------------------------------------------------------------------------------------------------------------------------------------------------------------------------------------------------------------------------------------------------------------------------------------------------------------------------------------------------------------------------------------------------------------------------------------------------------------------------------------------------------------------------------------------------|
| Journal:                        | <i>BMJ Open</i>                                                                                                                                                                                                                                                                                                                                                                                                                                                                                                                                                                                                                                                                                                                                                                |
| Manuscript ID                   | bmjopen-2018-024191.R1                                                                                                                                                                                                                                                                                                                                                                                                                                                                                                                                                                                                                                                                                                                                                         |
| Article Type:                   | Protocol                                                                                                                                                                                                                                                                                                                                                                                                                                                                                                                                                                                                                                                                                                                                                                       |
| Date Submitted by the Author:   | 19-Sep-2018                                                                                                                                                                                                                                                                                                                                                                                                                                                                                                                                                                                                                                                                                                                                                                    |
| Complete List of Authors:       | Monsour, Andrea; The Hospital for Sick Children Research Institute, Child Health Evaluative Sciences<br>Mew, Emma; The Hospital for Sick Children Research Institute, Child Health Evaluative Sciences<br>Szatmari, Peter; The Hospital for Sick Children; Centre for Addiction and Mental Health, Cundill Centre for Child and Youth Depression<br>Patel, Sagar ; The Hospital for Sick Children Research Institute , Child Health Evaluative Sciences<br>Saeed, Leena ; The Hospital for Sick Children Research Institute , Child Health Evaluative Sciences<br>Offringa, Martin; The Hospital for Sick Children Research Institute, Child Health Evaluative Sciences<br>Butcher, Nancy; The Hospital for Sick Children Research Institute, Child Health Evaluative Sciences |
| <b>Primary Subject Heading</b>: | Mental health                                                                                                                                                                                                                                                                                                                                                                                                                                                                                                                                                                                                                                                                                                                                                                  |
| Secondary Subject Heading:      | Research methods, Paediatrics, Epidemiology                                                                                                                                                                                                                                                                                                                                                                                                                                                                                                                                                                                                                                                                                                                                    |
| Keywords:                       | Major depressive disorder, Adolescent, Clinical trial, Outcome reporting, Core outcome set, Systematic scoping review                                                                                                                                                                                                                                                                                                                                                                                                                                                                                                                                                                                                                                                          |
|                                 |                                                                                                                                                                                                                                                                                                                                                                                                                                                                                                                                                                                                                                                                                                                                                                                |

SCHOLARONE™  
Manuscripts

Monsour et al.

# Outcomes reported in randomized controlled trials of major depressive disorder treatments in adolescents: a systematic scoping review protocol

Andrea Monsour, MPH,<sup>1</sup> Emma J. Mew, MPH,<sup>1</sup> Peter Szatmari, MD,<sup>2</sup> Sagar Patel, HBSc,<sup>1</sup> Leena Saeed, BSc,<sup>1</sup> Martin Offringa, MD PhD,<sup>1</sup> Nancy J. Butcher, PhD, MSc<sup>1</sup>

## Author affiliations

<sup>1</sup>Child Health Evaluative Sciences, The Hospital for Sick Children Research Institute, Toronto, Ontario, Canada

<sup>2</sup>The Hospital for Sick Children, Cundill Centre for Child and Youth Depression at the Centre for Addiction and Mental Health, and Department of Psychiatry, University of Toronto

## Author emails

AM: andrea.monsour@sickkids.ca

EJM: emma.mew@sickkids.ca

PS: peter.szatmari@utoronto.ca

SP: sagarb.patel@mail.utoronto.ca

LS: leena.saeed@mail.utoronto.ca

MO: martin.offringa@sickkids.ca

NJB: nancy.butcher@sickkids.ca

## Corresponding author

Dr. Nancy Butcher

The Hospital for Sick Children, Peter Gilgan Centre for Research and Learning

686 Bay Street, 11<sup>th</sup> floor, South 16, Toronto, Ontario, M5G 0A4

Tel: 416-813-7654 ext 309650

Email: nancy.butcher@sickkids.ca

## Keywords

major depressive disorder, adolescent, clinical trial, outcome reporting, core outcome set, systematic scoping review

**Text Word Count:** 2340

**Abstract Word Count:** 272

**Tables:** 0

**Figures:** 0

## ABSTRACT

**Introduction:** Major depressive disorder (MDD) is a common mental health condition in adolescents. Randomized clinical trials (RCTs) are the gold-standard for assessing the safety and efficacy of interventions in this population. Heterogeneity in the outcomes measured and reported between RCTs limits the ability to compare, contrast, and combine trial results in a clinically meaningful way. There is currently no core outcome set (COS) available for use in RCTs evaluating interventions in adolescents with MDD. We will conduct a systematic scoping review of outcomes reported in adolescent depression RCTs to assess the variability of trial outcomes and to inform the development of a COS for adolescent MDD.

**Methods and analysis:** We will apply methods based on the Joanna Briggs Institute scoping review methods manual. RCTs evaluating any treatment intervention for adolescent MDD published in the last ten years will be located using an electronic bibliographic database search (MEDLINE, PsycINFO, and Cochrane Central Register of Controlled Trials). Title and abstract screening, full-text screening, and data charting of eligible studies will be performed in duplicate. Outcomes identified will be mapped to an outcome domain framework. Data analysis will include summary statistics of the characteristics of the included trials and outcomes.

**Ethics and dissemination:** The results of this review will inform the development of a COS for adolescent MDD. The development and implementation of a COS for RCTs evaluating interventions in adolescents with MDD promises to help reduce variability in trial outcome selection, definition, measurement, and reporting, ultimately facilitating evidence synthesis that will help to identify best treatment practices for adolescents with MDD.

**Registration details:** This protocol was registered prospectively with the Open Science Framework (<https://osf.io/xjz9u/>).

### Strengths and limitations of this study

- Our systematic methods are based on the Joanna Briggs Institute scoping review methods manual and the guidelines provided by the Core Outcome Measures in Effectiveness Trials (COMET) Initiative.
- We will employ a rigorous search strategy using validated search filters developed with research librarians.
- We will only include studies published in English within the past ten years.
- As this is a scoping review to collect reported outcomes, quality of the evidence and risk of bias of included studies will not be systematically assessed.

## INTRODUCTION

Major depressive disorder (MDD) is a debilitating mental health condition that affects more than 300 million people worldwide.<sup>1</sup> MDD has been estimated to affect approximately 5% of adolescents,<sup>2,3</sup> and can profoundly impact psychosocial, family, and academic functioning.<sup>2,4</sup> Adolescents with MDD are at increased risk of suicide as well as depressive disorders and poor functional outcomes in adulthood.<sup>5-9</sup> Randomized clinical trials (RCTs) remain the gold-standard for assessing interventions in this population and are essential given that the safety and efficacy profile of treatment interventions in adolescents may differ from the profiles observed in adult studies.<sup>10</sup> For example, tricyclic antidepressants, an effective pharmacological treatment for MDD in adults, demonstrated no efficacy in adolescents.<sup>11</sup> Unfortunately, recent meta-analyses of adolescent MDD trials have been characterized by high heterogeneity in reported outcome data,<sup>12,13</sup> which limits data synthesis and the interpretation and usability of trial results for clinical decision making practices.

Variability in the selection and reporting of trial outcomes is a well-recognized challenge in biomedical research.<sup>14-17</sup> This contributes to considerable avoidable waste of the financial and human resources invested in these trials, including participant time and effort.<sup>18</sup> One proposed solution to this is the development and implementation of core outcome sets (COS).<sup>14-16</sup> A COS is an agreed minimum set of outcomes that should be measured and reported in all trials in a specific condition (“what” to measure).<sup>19</sup> COS are also suitable for use in clinical audit and research studies other than RCTs.<sup>19</sup> Recommended practice for COS development includes collating candidate outcomes through systematic literature reviews of outcomes in published studies and consensus methods with the community of stakeholders as to what outcomes should be included in a COS, such as Delphi surveys and face-to-face meetings.<sup>20</sup> Once consensus on what to measure is achieved through development of the COS, the corresponding outcome measurement instrument for each outcome, and the timing of its application (“how” and “when” to measure), can be evaluated and selected for use in the COS using separate methods.<sup>21</sup> The Core Outcome Measures in Effectiveness Trials (COMET) Initiative<sup>19</sup> currently houses over 1000 references related to COS across a wide variety of health conditions. However, no COS for use in studies of adolescents with MDD exists to date, and evidence-users are left with a lack of consensus and variability in the field with respect to outcome selection, definition, measurement, and reporting.<sup>22</sup>

This paper outlines the methods for a systematic scoping review that will represent the first step of the development of a COS for RCTs evaluating interventions in adolescents with MDD.<sup>23</sup> This COS was registered with the COMET initiative in February 2018.<sup>23</sup> The objective of this scoping review is to identify and characterize outcomes reported in published adolescent MDD trials. These results will be used to evaluate the extent of outcome heterogeneity in RCTs in adolescents with MDD, and will provide an initial list of outcomes to consider in a COS for this population.

## METHODS AND ANALYSIS

### Study design

A systematic scoping review is the most appropriate approach for addressing the aim of this study, as it uses a knowledge synthesis approach that maps concepts underpinning a research area and the main sources and types of evidence available.<sup>24-26</sup> This protocol is based on the recommendations provided by the Joanna Briggs Institute scoping review methods manual<sup>24</sup> and follows recommended systematic methods.<sup>27</sup>

## Protocol

This protocol was drafted in accordance with the Preferred Reporting Items for Systematic Reviews and Meta-Analysis for Protocols (PRISMA-P) reporting guideline (online supplementary appendix A).<sup>28</sup> The final scoping review will follow the Preferred Reporting Items for Systematic Reviews and Meta-Analysis extension for Scoping Reviews (PRISMA-ScR).<sup>29</sup> This project was registered with the COMET Initiative on 26 February 2018.<sup>23</sup> The protocol preprint was registered prospectively with the Open Science Framework on 8 May 2018.<sup>30</sup> Important protocol amendments, if made, will be documented on this webpage.<sup>30</sup> The review commenced in May 2018, after this protocol was submitted, and is anticipated to be completed by December 2018. Data charting and synthesis is ongoing.

## Eligibility criteria

The eligibility criteria for the included studies are based on the PICOT framework:<sup>31</sup>

**Population (P):** Adolescents aged 12 to 18 years<sup>32</sup> with a diagnosis of major depressive disorder as defined by the diagnostic criteria in the Diagnostic and Statistical Manual of Mental Disorders<sup>33</sup>, or depressive disorder as per International Statistical Classification of Diseases (ICD) criteria<sup>34</sup>, will be eligible, made using a validated diagnostic interview and/or through a clinician diagnosis. Adolescents with co-morbid psychiatric conditions will be included. RCTs that include participants with ages outside this range will be included if (1) the reported mean or median participant age falls within the range of 12 to 18 years, or (2) there is a subgroup analysis that contains adolescents aged between 12 and 18 years inclusive (e.g., trials with a subgroup analysis of ages 13 to 15 years would be eligible, but a subgroup analysis of ages 16 to 20 years would not be eligible).

**Intervention (I):** All treatment interventions for MDD (i.e., pharmacological and non-pharmacological) will be eligible.

**Comparators (C):** There will be no comparator restrictions.

**Outcomes (O):** All planned outcomes will be eligible, meaning all outcomes specified in the published methods to be collected for randomized group comparisons. Health status outcomes (e.g., severity of depressive symptoms), as well as resource use outcomes (e.g., number of outpatient appointments, impact on family finances) and delivery of care outcomes (e.g., acceptability of intervention, treatment adherence), will be included in this review following established taxonomy;<sup>35</sup> these are recommended for consideration for inclusion in COS. Treatment-emergent adverse events detected through standard adverse event (AE) monitoring will not be included as these are not planned outcomes of interest (e.g., headaches self-reported at a study visit during AE assessment) and are specific to the intervention of interest.

Studies will be eligible if published within the last ten years (2008 to 2017 inclusive) to capture recently conducted and reported trials. There will be no restrictions on when the outcomes were measured or duration of follow-up after initiation of the intervention. Only RCTs published in English will be included for feasibility. Trials from any country or setting will be eligible. Pilot and feasibility RCTs, as well as interim reports will be eligible for inclusion, only when a final trial report is not available for inclusion to avoid double counting of any outcomes.

## Information sources and search strategy



We will locate studies for inclusion using an electronic bibliographic database search applied to MEDLINE, PsycINFO, and the Cochrane Central Register of Controlled Trials. The search strategy was collaboratively developed by review team authors experienced with electronic bibliographic database search strategies (AM, EJM, MO, NJB) including a child and adolescent psychiatrist (PS), in consultation with an experienced research librarian (AMa). Search strategy development was informed by an analysis of the MeSH terms and text words contained in the title, abstract, and keyword headings from a sample of relevant articles identified from informal literature searching.<sup>36-39</sup> The proposed search strategy was then reviewed by a second expert research librarian (TAW). The final search strategy found in online supplementary appendix B incorporated feedback from TAW, who reviewed the final version using the PRESS (Peer Review of Electronic Search Strategies) guideline and required no further revisions.<sup>40</sup> MEDLINE and PsycINFO search strategies use validated search filters to identify RCTs.<sup>41</sup> Trained team members (AM, LS) will perform the final searches and de-duplicate the results using EndNote version X8.<sup>42</sup>

## Source selection

### Initial Screening

Titles and abstracts will first be screened to assess eligibility. Two trained reviewers will screen independently and in duplicate. All discrepancies identified will be reviewed by a third reviewer, so that clarifications with respect to study eligibility can be made as needed and any obviously irrelevant reports can be removed at this stage. The two reviewers will complete training and reliability testing on a random sample of the search results (e.g., 100 candidate articles) until sufficient inter-rater reliability is achieved (e.g.,  $\geq 80\%$  agreement). Studies included by both reviewers and those with unresolved discrepant decisions will move to full-text screening.

### Full-text screening

Two trained reviewers will screen the full-text of studies for eligibility independently and in duplicate. All discrepancies will be resolved through discussion with a third reviewer. The reviewers will complete training and reliability testing on a random sample of documents included from initial screening until sufficient inter-rater reliability is achieved (e.g.,  $\geq 80\%$  agreement). Reasons for study exclusion will be logged using REDCap (Research Electronic Data Capture) data management software.<sup>43</sup> When necessary, we will contact authors to clarify eligibility criteria. Included studies will move to data charting. The final list of included articles will be reviewed by a child and adolescent psychiatrist (PS) and any additional RCTs identified meeting study eligibility criteria will also be included.

### Data charting

All studies included from full-text screening will undergo data charting in duplicate by two trained reviewers using a standardized charting form developed using REDCap data management software.<sup>43</sup> Disagreements will be resolved through a third team member, when necessary. The following data will be charted: publication identifiers (e.g., journal, year, first author), study characteristics (e.g., participant age group, total sample size, intervention type, length of follow-up, region(s) of study setting, and funding source type). We will chart the following data for each outcome: definition of outcome, definition of meaningful change, outcome type (e.g., single vs. composite), and outcome measurement instrument(s) used. We note that other terms for outcome may be used in the included studies, such as endpoint or outcome measure.<sup>44</sup> In the context of adolescent MDD, an example of an outcome would be 'severity of MDD symptoms', and an example of an outcome measurement instrument would be the 'Children's Depression Rating Scale-Revised'.<sup>45</sup> We will also chart which outcomes were categorized as primary, secondary, or were not specified as either primary or secondary. We will classify an outcome as



1  
2  
3 a 'primary outcome' when studies explicitly report at least one of the following: (1) a study  
4 outcome is explicitly referred to as a 'primary outcome'; (2) outcome data was used to calculate  
5 sample size; or (3) study objective explicitly included examining an intervention effect on that  
6 outcome.<sup>46</sup> Notably, multiple primary outcomes are commonly reported in depression RCTs.<sup>47</sup>  
7

8 After data charting, the identified outcomes will be synthesized and grouped through  
9 assignment to thematic 'outcome terms', as appropriate, consistent with the development of  
10 other COS.<sup>20 46</sup> For example, the outcomes 'psychosocial improvement' and 'level of functioning  
11 at school, home, and in the community' could be grouped under the outcome term 'social  
12 functioning'.<sup>37 48</sup> For composite outcomes, each individual component of the composite  
13 outcome, if reported, will be grouped under its appropriate outcome term.<sup>46</sup> All outcome terms  
14 will then be assigned (herein referred to as 'outcome mapping') to an existing or adapted  
15 outcome framework, such as those described by COMET Handbook and elsewhere.<sup>20 49</sup>  
16 Outcome grouping and outcome mapping will be performed in consultation with child and  
17 adolescent psychiatrists and/or methodological experts.  
18  
19

### 20 **Pilot testing**

21 We will pilot the full-text review and data charting forms on a sample of ten relevant documents  
22 before full-text review begins. We will also conduct a preliminary analysis to pilot the data  
23 summary process.  
24

### 25 **Risk of bias assessment or quality appraisal**

26 As this is a scoping review, we will not conduct risk of bias assessments or quality appraisals of  
27 included sources. This approach is consistent with the Joanna Briggs Institute manual.<sup>24</sup>  
28

### 29 **Synthesis of results**

30 Data analysis will include quantitative measures (counts and frequencies) of study and outcome  
31 characteristics (e.g., number of included papers, total number of outcomes, total number of  
32 outcome measurement instruments, median number of outcomes per study). Tables will be  
33 used to display, for example, the characteristics of the included studies and outcomes, as well  
34 as the variation in outcome definitions. We will present the results of mapping outcome terms  
35 using, for example, a modified outcome matrix model inspired by the Outcome Reporting for  
36 Brief Intervention Trials (ORBIT) project<sup>50</sup> and adopted in other COS developments.<sup>46</sup>  
37  
38

### 39 **Patient and Public Involvement**

40 Due to the methodological focus of this scoping review, patients and/or public were not involved  
41 in this study. Patients will be involved in later stages of the COS development process.<sup>20</sup>  
42

## 43 **DISCUSSION**

44  
45 This review will identify and map all outcomes reported in recent RCTs for the treatment of  
46 adolescent MDD. This comprehensive list of outcomes will provide the basis for the  
47 development of a COS for adolescent MDD. Methods outlining the development of the COS will  
48 be published separately.  
49

### 50 **Implications**

51 The conduct of high-quality clinical trials that measure meaningful and clearly defined outcomes  
52 that facilitate evidence synthesis efforts is critical to identify the best treatments for adolescents  
53 with MDD. Research findings on adolescent MDD may be difficult to interpret, replicate, or  
54 include in evidence synthesis efforts due, in part, from the heterogeneity of the outcomes  
55 measured and reported in clinical trials. This systematic scoping review will identify the extent of  
56  
57  
58  
59

1  
2  
3 outcome heterogeneity in published RCTs in adolescents with MDD and will help inform the  
4 development of a COS. Additional candidate outcomes for the COS, such as those that are  
5 important to patients and their families, but that have not been measured in RCTs to date, or  
6 new outcomes being measured in upcoming or ongoing RCTs, or those that may not have been  
7 identified in this review related to search limitations, may be identified during later stages of the  
8 COS development process by engaging with stakeholders.  
9

10 Notably, there is currently a COS being developed for adult depression,<sup>22</sup> for which there may  
11 be different outcomes of interest compared with the adolescent population, (e.g., related to  
12 developmental differences and differences in treatment response). Future studies will be  
13 needed to identify the outcomes relevant to childhood depression that are outside the scope of  
14 this review, and to generate a developmentally-sensitive COS and corresponding outcome  
15 measurement instruments for this younger population. The development and uptake of a COS  
16 for adolescent MDD promises to help improve the standardization of outcome selection, and in  
17 turn, improve clinical decision-making and reduce research waste.<sup>20 51</sup>  
18  
19

### 20 **Dissemination**

21 The results of this scoping review will be published in a peer-review journal. We will circulate the  
22 publication to the COMET Initiative and other relevant mailing lists and social media platforms.  
23

### 24 **ETHICS**

25 This scoping review does not require ethical approval.  
26

### 27 **AUTHOR CONTRIBUTIONS**

28 NJB, MO, and PS were responsible for study conception. AM, EJM, and NJB were responsible  
29 for study design. AM, EJM, SP, LS, and NJB drafted the manuscript. All authors critically  
30 reviewed and provided feedback on the study design and manuscript. All authors read and  
31 approved the protocol prior to its submission.  
32

### 33 **FUNDING STATEMENT**

34 This research received no specific grant from any funding agency in the public, commercial or  
35 not-for-profit sectors.  
36

### 37 **COMPETING INTERESTS**

38 The authors declare no conflicts of interest.  
39

### 40 **ACKNOWLEDGEMENTS**

41 The authors wish to thank Alanna Marson (AMa) and Tamsin Adams-Webber (TAW) from the  
42 Hospital for Sick Children Library for their assistance in developing the electronic bibliographic  
43 database search strategy.  
44  
45  
46  
47  
48  
49  
50  
51  
52  
53  
54  
55  
56  
57  
58  
59  
60

## REFERENCES

- 1 World Health Organization. Depression and other common mental disorders: global health estimates. Geneva: World Health Organization, 2017.
- 2 Thapar A, Collishaw S, Pine DS, *et al*. Depression in adolescence. *Lancet* 2012;**379**:1056-67. doi: 10.1016/S0140-6736(11)60871-4.
- 3 Merikangas KR, Nakamura EF, Kessler RC. Epidemiology of mental disorders in children and adolescents. *Dialogues Clin Neurosci* 2009;**11**:7-20.
- 4 Wagner S, Müller C, Helmreich I, *et al*. A meta-analysis of cognitive functions in children and adolescents with major depressive disorder. *Eur Child Adolesc Psychiatry* 2015;**24**:5-19. doi: 10.1007/s00787-014-0559-2.
- 5 Weissman MM, Wolk S, Goldstein RB, *et al*. Depressed adolescents grown up. *JAMA* 1999;**281**:1707-13.
- 6 Copeland WE, Wolke D, Shanahan L, *et al*. Adult functional outcomes of common childhood psychiatric problems: a prospective, longitudinal study. *JAMA Psychiatry* 2015;**72**:892-9. doi: 10.1001/jamapsychiatry.2015.0730.
- 7 Rao U, Weissman MM, Martin JA, *et al*. Childhood depression and risk of suicide: a preliminary report of a longitudinal study. *J Am Acad Child Adolesc Psychiatry* 1993;**32**:21-7. doi: 10.1097/00004583-199301000-00004.
- 8 Goren JL. Antidepressants use in pediatric populations. *Expert Opin Drug Saf* 2008;**7**:223-5. doi: 10.1517/14740338.7.3.223.
- 9 Pine DS, Cohen P, Gurley D, *et al*. The risk for early-adulthood anxiety and depressive disorders in adolescents with anxiety and depressive disorders. *Arch Gen Psychiatry* 1998;**55**:56-64. doi: 10.1001/archpsyc.55.1.56.
- 10 Emslie GJ, Mayes TL, Ruberu M. Continuation and maintenance therapy of early-onset major depressive disorder. *Paediatr Drugs* 2005;**7**:203-17.
- 11 Arroll B, Macgillivray S, Ogston S, *et al*. Efficacy and tolerability of tricyclic antidepressants and SSRIs compared with placebo for treatment of depression in primary care: a meta-analysis. *Ann Fam Med* 2005;**3**:449-56. doi: 10.1370/afm.349.
- 12 Cox GR, Callahan P, Churchill R, *et al*. Psychological therapies versus antidepressant medication, alone and in combination for depression in children and adolescents. *Cochrane Database Syst Rev* 2014:CD008324. doi: 10.1002/14651858.CD008324.pub3.
- 13 Hazell P, Mirzaie M. Tricyclic drugs for depression in children and adolescents. *Cochrane Database Syst Rev* 2013:CD002317. doi: 10.1002/14651858.CD002317.pub2.
- 14 Idzerda L, Rader T, Tugwell P, *et al*. Can we decide which outcomes should be measured in every clinical trial? A scoping review of the existing conceptual frameworks and processes to develop core outcome sets. *J Rheumatol* 2014;**41**:986-93.
- 15 Williamson P, Altman D, Blazeby J, *et al*. Driving up the quality and relevance of research through the use of agreed core outcomes. *J Health Serv Res Policy* 2012;**17**:1-2. doi: 10.1258/jhsrp.2011.011131.
- 16 Gorst SL, Gargon E, Clarke M, *et al*. Choosing important health outcomes for comparative effectiveness research: an updated review and user survey. *PLoS One* 2016;**11**:e0146444. doi: 10.1371/journal.pone.0146444.
- 17 Macleod MR, Michie S, Roberts I, *et al*. Biomedical research: increasing value, reducing waste. *Lancet* 2014;**383**:101-04. doi: 10.1016/S0140-6736(13)62329-6.
- 18 Chalmers I, Glasziou P. Avoidable waste in the production and reporting of research evidence. *Lancet* 2009;**374**:86-89. doi: 10.1016/s0140-6736(09)60329-9.
- 19 COMET Initiative Website 2018 [Available from: <http://www.comet-initiative.org/> (accessed 10 August 2018)].

- 1  
2  
3 20 Williamson PR, Altman DG, Bagley H, *et al*. The COMET Handbook: version 1.0. *Trials*  
4 2017;**18**:280. doi: 10.1186/s13063-017-1978-4.
- 5 21 Prinsen CA, Vohra S, Rose MR, *et al*. How to select outcome measurement instruments for  
6 outcomes included in a "Core Outcome Set" - a practical guideline. *Trials* 2016;**17**:449.  
7 doi: 10.1186/s13063-016-1555-2.
- 8 22 Chevance A, Ravaud P. New methods for the development of Core Outcome Set: the  
9 example of depression. 2018.
- 10 23 Core set of outcomes for adolescents with major depressive disorder: a tool of standardized  
11 outcomes for clinical research and practice: COMET Initiative; 2018 [Available from:  
12 <http://www.comet-initiative.org/studies/details/1122> (accessed 20 April 2018).
- 13 24 The Joanna Briggs Institute. Reviewers' Manual 2015 Methodology for JBI Scoping Reviews,  
14 2015.
- 15 25 Colquhoun HL, Levac D, O'Brien KK, *et al*. Scoping reviews: time for clarity in definition,  
16 methods, and reporting. *J Clin Epidemiol* 2014;**67**:1291-4. doi:  
17 10.1016/j.jclinepi.2014.03.013.
- 18 26 Tricco AC, Lillie E, Zarin W, *et al*. A scoping review on the conduct and reporting of scoping  
19 reviews. *BMC Med Res Methodol* 2016;**16**:15. doi: 10.1186/s12874-016-0116-4.
- 20 27 Peters MD, Godfrey CM, Khalil H, *et al*. Guidance for conducting systematic scoping  
21 reviews. *Int J Evid Based Healthc* 2015;**13**:141-6. doi:  
22 10.1097/XEB.000000000000050.
- 23 28 Moher D, Shamseer L, Clarke M, *et al*. Preferred reporting items for systematic review and  
24 meta-analysis protocols (PRISMA-P) 2015 statement. *Syst Rev* 2015;**4**:1. doi:  
25 10.1186/2046-4053-4-1.
- 26 29 Tricco AC, Lillie E, Zarin W, *et al*. Prisma extension for scoping reviews (PRISMA-ScR):  
27 Checklist and explanation. *Ann Intern Med* 2018 doi: 10.7326/M18-0850.
- 28 30 Monsour A, Mew EJ, Szatmari P, *et al*. Outcome reporting in randomized controlled trials of  
29 major depressive disorder treatments in adolescents: a systematic scoping review  
30 protocol. 2018. <https://osf.io/xjz9u/> (accessed 14 May 2018).
- 31 31 Thabane L, Thomas T, Ye C, *et al*. Posing the research question: not so simple. *Can J*  
32 *Anaesth* 2008;**56**:71. doi: 10.1007/s12630-008-9007-4.
- 33 32 Williams K, Thomson D, Seto I, *et al*. Standard 6: age groups for pediatric trials. *Pediatrics*  
34 2012;**129** Suppl 3:S153-60. doi: 10.1542/peds.2012-0055I.
- 35 33 American Psychiatric Association. Diagnostic and statistical manual of mental disorders, fifth  
36 edition. Arlington, VA: American Psychiatric Association 2013.
- 37 34 World Health Organization. International Classification of Diseases and Related Health  
38 Problems 10th Revision (ICD-10). Geneva, 2007.
- 39 35 Dodd S, Clarke M, Becker L, *et al*. A taxonomy has been developed for outcomes in medical  
40 research to help improve knowledge discovery. *J Clin Epidemiol* 2018;**96**:84-92. doi:  
41 10.1016/j.jclinepi.2017.12.020.
- 42 36 Brent D, Emslie G, Clarke G, *et al*. Switching to another SSRI or to venlafaxine with or  
43 without cognitive behavioral therapy for adolescents with SSRI-resistant depression: the  
44 TORDIA randomized controlled trial. *JAMA* 2008;**299**:901-13. doi:  
45 10.1001/jama.299.8.901.
- 46 37 Goodyer IM, Dubicka B, Wilkinson P, *et al*. A randomised controlled trial of cognitive  
47 behaviour therapy in adolescents with major depression treated by selective serotonin  
48 reuptake inhibitors. The ADAPT trial. *Health Technol Assess* 2008;**12**:iii-iv, ix-60.
- 49 38 Jacobs RH, Watkins ER, Peters AT, *et al*. Targeting ruminative thinking in adolescents at risk  
50 for depressive relapse: rumination-focused cognitive behavior therapy in a pilot  
51 randomized controlled trial with resting state fMRI. *PLoS One* 2016;**11**:e0163952. doi:  
52 10.1371/journal.pone.0163952.
- 53  
54  
55  
56  
57  
58  
59  
60

- 1  
2  
3 39 March J, Silva S, Vitiello B. The Treatment for Adolescents With Depression Study (TADS). *J*  
4 *Am Acad Child Adolesc Psychiatry* 2006;**45**:1393-403. doi:  
5 10.1097/01.chi.0000237709.35637.c0.  
6  
7 40 McGowan J, Sampson M, Salzwedel DM, *et al*. PRESS Peer Review of Electronic Search  
8 Strategies: 2015 Guideline Statement. *J Clin Epidemiol* 2016;**75**:40-6. doi:  
9 10.1016/j.jclinepi.2016.01.021.  
10  
11 41 Health Information Research Unit. Hedges: Health Information Research Unit: Evidence-  
12 Based Health Informatics; 2016 [updated 9 February 2016. Available from:  
13 [https://hiru.mcmaster.ca/hiru/HIRU\\_Hedges\\_home.aspx](https://hiru.mcmaster.ca/hiru/HIRU_Hedges_home.aspx) (accessed 11 May 2018).  
14  
15 42 EndNote X8 [program], 2016.<http://endnote.com/product-details>.  
16  
17 43 Harris PA, Taylor R, Thielke R, *et al*. Research Electronic Data Capture (REDCap) - A  
18 metadata-driven methodology and workflow process for providing translational research  
19 informatics support. *J Biomed Inform* 2009;**42**:377-81. doi: 10.1016/j.jbi.2008.08.010.  
20  
21 44 Boers M, Kirwan JR, Wells G, *et al*. Developing core outcome measurement sets for clinical  
22 trials: OMERACT filter 2.0. *J Clin Epidemiol* 2014;**67**:745-53. doi:  
23 10.1016/j.jclinepi.2013.11.013.  
24  
25 45 Mayes T, Bernstein I, L Haley C, *et al*. Psychometric properties of the Children's Depression  
26 Rating Scale-Revised in adolescents. *J Child Adolesc Psychopharmacol* 2010;**20**:513-6.  
27 doi: 10.1089/cap.2010.0063.  
28  
29 46 Hall NJ, Kapadia MZ, Eaton S, *et al*. Outcome reporting in randomised controlled trials and  
30 meta-analyses of appendicitis treatments in children: a systematic review. *Trials*  
31 2015;**16**:275. doi: 10.1186/s13063-015-0783-1.  
32  
33 47 Tyler KM, Normand SL, Horton NJ. The use and abuse of multiple outcomes in randomized  
34 controlled depression trials. *Contemp Clin Trials* 2011;**32**:299-304. doi:  
35 10.1016/j.cct.2010.12.007.  
36  
37 48 Treatment for Adolescents with Depression Study Team. Treatment for Adolescents with  
38 Depression Study (TADS): Rationale, design, and methods. *J Am Acad Child Adolesc*  
39 *Psychiatry* 2003;**42**:531-42.  
40  
41 49 ICHOM Standard Set for Depression & Anxiety Working Group. ICHOM Depression and  
42 Anxiety Data Collection Reference Guide. 2.3.1 ed. London, UK: ICHOM, 2017:63.  
43  
44 50 Kirkham JJ, Dwan KM, Altman DG, *et al*. The impact of outcome reporting bias in  
45 randomised controlled trials on a cohort of systematic reviews. *BMJ* 2010;**340**:c365. doi:  
46 10.1136/bmj.c365.  
47  
48 51 Glasziou P, Altman DG, Bossuyt P, *et al*. Reducing waste from incomplete or unusable  
49 reports of biomedical research. *Lancet* 2014;**383**:267-76. doi: 10.1016/s0140-  
50 6736(13)62228-x.  
51  
52  
53  
54  
55  
56  
57  
58  
59  
60



## APPENDIX A

eTable 1. PRISMA-P checklist.<sup>1</sup>

| Section and topic                 | Item No | Checklist item                                                                                                                                                                                                                | Location in manuscript                                                                                                                                                                                                                   |
|-----------------------------------|---------|-------------------------------------------------------------------------------------------------------------------------------------------------------------------------------------------------------------------------------|------------------------------------------------------------------------------------------------------------------------------------------------------------------------------------------------------------------------------------------|
| <b>ADMINISTRATIVE INFORMATION</b> |         |                                                                                                                                                                                                                               |                                                                                                                                                                                                                                          |
| Title:                            |         |                                                                                                                                                                                                                               |                                                                                                                                                                                                                                          |
| Identification                    | 1a      | Identify the report as a protocol of a systematic review                                                                                                                                                                      | Title                                                                                                                                                                                                                                    |
| Update                            | 1b      | If the protocol is for an update of a previous systematic review, identify as such                                                                                                                                            | Not applicable, and therefore, not stated                                                                                                                                                                                                |
| Registration                      | 2       | If registered, provide the name of the registry (such as PROSPERO) and registration number                                                                                                                                    | URL provided for Open Science Framework registration in abstract and in the section entitled "Protocol" under the heading "METHODS AND ANALYSIS"                                                                                         |
| Authors:                          |         |                                                                                                                                                                                                                               |                                                                                                                                                                                                                                          |
| Contact                           | 3a      | Provide name, institutional affiliation, e-mail address of all protocol authors; provide physical mailing address of corresponding author                                                                                     | Cover page                                                                                                                                                                                                                               |
| Contributions                     | 3b      | Describe contributions of protocol authors and identify the guarantor of the review                                                                                                                                           | Under heading "AUTHORS CONTRIBUTIONS"                                                                                                                                                                                                    |
| Amendments                        | 4       | If the protocol represents an amendment of a previously completed or published protocol, identify as such and list changes; otherwise, state plan for documenting important protocol amendments                               | Under the section entitled "Protocol" under the heading "METHODS AND ANALYSIS"                                                                                                                                                           |
| Support:                          |         |                                                                                                                                                                                                                               |                                                                                                                                                                                                                                          |
| Sources                           | 5a      | Indicate sources of financial or other support for the review                                                                                                                                                                 | Under heading "FUNDING STATEMENT"                                                                                                                                                                                                        |
| Sponsor                           | 5b      | Provide name for the review funder and/or sponsor                                                                                                                                                                             | Under heading "FUNDING STATEMENT"                                                                                                                                                                                                        |
| Role of sponsor or funder         | 5c      | Describe roles of funder(s), sponsor(s), and/or institution(s), if any, in developing the protocol                                                                                                                            | None; not applicable                                                                                                                                                                                                                     |
| <b>INTRODUCTION</b>               |         |                                                                                                                                                                                                                               |                                                                                                                                                                                                                                          |
| Rationale                         | 6       | Describe the rationale for the review in the context of what is already known                                                                                                                                                 | Under "INTRODUCTION"                                                                                                                                                                                                                     |
| Objectives                        | 7       | Provide an explicit statement of the question(s) the review will address with reference to participants, interventions, comparators, and outcomes (PICO)                                                                      | Objectives provided in "INTRODUCTION"                                                                                                                                                                                                    |
| <b>METHODS</b>                    |         |                                                                                                                                                                                                                               |                                                                                                                                                                                                                                          |
| Eligibility criteria              | 8       | Specify the study characteristics (such as PICO, study design, setting, time frame) and report characteristics (such as years considered, language, publication status) to be used as criteria for eligibility for the review | PICOT provided under section "Eligibility criteria" under the heading "METHODS AND ANALYSIS"                                                                                                                                             |
| Information sources               | 9       | Describe all intended information sources (such as electronic databases, contact with study authors, trial registers or other grey literature sources) with planned dates of coverage                                         | Date restrictions provided under section "Eligibility criteria" under the heading "METHODS AND ANALYSIS". Information sources described under section "Information sources and search strategy" under the heading "METHODS AND ANALYSIS" |
| Search strategy                   | 10      | Present draft of search strategy to be used                                                                                                                                                                                   | Final search strategies provided in Appendix                                                                                                                                                                                             |

|                                    |     |                                                                                                                                                                                                                                                  |                                                                                                                                                                                             |
|------------------------------------|-----|--------------------------------------------------------------------------------------------------------------------------------------------------------------------------------------------------------------------------------------------------|---------------------------------------------------------------------------------------------------------------------------------------------------------------------------------------------|
|                                    |     | for at least one electronic database, including planned limits, such that it could be repeated                                                                                                                                                   | B                                                                                                                                                                                           |
| Study records:                     |     |                                                                                                                                                                                                                                                  |                                                                                                                                                                                             |
| Data management                    | 11a | Describe the mechanism(s) that will be used to manage records and data throughout the review                                                                                                                                                     | Provided under the sub-section "Full-text screening" under the section "Source selection" and provided under the section and "Data charting", both under the heading "METHODS AND ANALYSIS" |
| Selection process                  | 11b | State the process that will be used for selecting studies (such as two independent reviewers) through each phase of the review (that is, screening, eligibility and inclusion in meta-analysis)                                                  | Provided under the sections "Source selection" and "Data charting" under the heading "METHODS AND ANALYSIS"                                                                                 |
| Data collection process            | 11c | Describe planned method of extracting data from reports (such as piloting forms, done independently, in duplicate), any processes for obtaining and confirming data from investigators                                                           | Provided under the sections "Data charting" and "Pilot testing" under the heading "METHODS AND ANALYSIS"                                                                                    |
| Data items                         | 12  | List and define all variables for which data will be sought (such as PICO items, funding sources), any pre-planned data assumptions and simplifications                                                                                          | Provided under the section "Data charting" under the heading "METHODS AND ANALYSIS"                                                                                                         |
| Outcomes and prioritization        | 13  | List and define all outcomes for which data will be sought, including prioritization of main and additional outcomes, with rationale                                                                                                             | Provided under the section "Data charting" under the heading "METHODS AND ANALYSIS"                                                                                                         |
| Risk of bias in individual studies | 14  | Describe anticipated methods for assessing risk of bias of individual studies, including whether this will be done at the outcome or study level, or both; state how this information will be used in data synthesis                             | Not applicable; this is a scoping review. However, explanation provided under section "Risk of bias assessment or quality appraisal" under the heading "METHODS AND ANALYSIS"               |
| Data synthesis                     | 15a | Describe criteria under which study data will be quantitatively synthesized                                                                                                                                                                      | Provided under section "Synthesis of results" under heading "METHODS AND ANALYSIS"                                                                                                          |
|                                    | 15b | If data are appropriate for quantitative synthesis, describe planned summary measures, methods of handling data and methods of combining data from studies, including any planned exploration of consistency (such as $I^2$ , Kendall's $\tau$ ) | Not applicable                                                                                                                                                                              |
|                                    | 15c | Describe any proposed additional analyses (such as sensitivity or subgroup analyses, meta-regression)                                                                                                                                            | Not applicable                                                                                                                                                                              |
|                                    | 15d | If quantitative synthesis is not appropriate, describe the type of summary planned                                                                                                                                                               | Provided under section "Synthesis of results" under heading "METHODS AND ANALYSIS"                                                                                                          |
| Meta-bias(es)                      | 16  | Specify any planned assessment of meta-bias(es) (such as publication bias across studies, selective reporting within studies)                                                                                                                    | Not applicable                                                                                                                                                                              |
| Confidence in cumulative evidence  | 17  | Describe how the strength of the body of evidence will be assessed (such as GRADE)                                                                                                                                                               | Not applicable                                                                                                                                                                              |

1. Moher D, Shamseer L, Clarke M, et al. Preferred reporting items for systematic review and meta-analysis protocols (PRISMA-P) 2015 statement. *Syst Rev* 2015;4:1.



## APPENDIX B

**eTable 2. Search strategy designed for the Ovid Medical Literature Analysis and Retrieval System Online (MEDLINE)® Epub Ahead of Print, In-Process & Other Non-Indexed Citations, Ovid MEDLINE® Daily and Ovid MEDLINE® 1946 to Present database.**

| Search term                                                                                                                                                                                                                                                                                                                  |
|------------------------------------------------------------------------------------------------------------------------------------------------------------------------------------------------------------------------------------------------------------------------------------------------------------------------------|
| 1. depressive disorder/ or depressive disorder, major/                                                                                                                                                                                                                                                                       |
| 2. (depressive disorder* or clinical depression* or unipolar depression* or major depression* or depressive disease* or depressive episode* or depressive illness* or depressive state* or depressive syndrome* or endogenous depression* or major depressive episode* or mental depression* or neurotic depression*).tw,kf. |
| 3. 1 or 2                                                                                                                                                                                                                                                                                                                    |
| 4. adolescent/                                                                                                                                                                                                                                                                                                               |
| 5. (adolescen* or teen* or girl or girls or boy or boys or youth* or peadiatric* or paediatric* or pediatric* or preadolescen* or preteen* or secondary school* or high school* or primary school* or elementary school*).tw,kf.                                                                                             |
| 6. 4 or 5                                                                                                                                                                                                                                                                                                                    |
| 7. 3 and 6                                                                                                                                                                                                                                                                                                                   |
| 8. randomized controlled trial.pt. or randomized.mp. or placebo.mp.                                                                                                                                                                                                                                                          |
| 9. 7 and 8                                                                                                                                                                                                                                                                                                                   |
| 10. limit 9 to yr="2008 - 2017"                                                                                                                                                                                                                                                                                              |
| 11. remove duplicates from 10                                                                                                                                                                                                                                                                                                |

Date of search: 9 May 2018. Line 8 taken verbatim from the Health Information Research Unit (HiRU) RCT search filter<sup>1</sup> (Sensitivity=96%; Specificity=95%; Precision=39%; Accuracy=95%).

**eTable 3. Search strategy designed for the Ovid PsycINFO® 1967 to April Week 5 2018 database.**

| Search term                                                                                                                                                                                                                                                                                                                  |
|------------------------------------------------------------------------------------------------------------------------------------------------------------------------------------------------------------------------------------------------------------------------------------------------------------------------------|
| 1. major depression/                                                                                                                                                                                                                                                                                                         |
| 2. (depressive disorder* or clinical depression* or unipolar depression* or major depression* or depressive disease* or depressive episode* or depressive illness* or depressive state* or depressive syndrome* or endogenous depression* or major depressive episode* or mental depression* or neurotic depression*).tw,id. |
| 3. 1 or 2                                                                                                                                                                                                                                                                                                                    |
| 4. (adolescen* or teen* or girl or girls or boy or boys or youth* or paediatric* or paediatric* or pediatric* or preadolescen* or preteen* or secondary school* or high school* or primary school* or elementary school*).mp.                                                                                                |
| 5. 3 and 4                                                                                                                                                                                                                                                                                                                   |
| 6. double-blind.tw. or random* assigned.tw. or control.tw.                                                                                                                                                                                                                                                                   |
| 7. 5 and 6                                                                                                                                                                                                                                                                                                                   |
| 8. limit 7 to yr="2008 - 2017"                                                                                                                                                                                                                                                                                               |
| 9. remove duplicates from 8                                                                                                                                                                                                                                                                                                  |

Date of search: 9 May 2018. Line 6 taken verbatim from the Health Information Research Unit (HiRU) RCT search filter<sup>1</sup> (Sensitivity=79%; Specificity=80%; Precision=13%; Accuracy – 80%).

**eTable 4. Search strategy designed for Ovid EBM Reviews - Cochrane Central Register of Controlled Trials March 2018 database.**

| Search term                                                                                                                                                                                                                                                                                                                  |
|------------------------------------------------------------------------------------------------------------------------------------------------------------------------------------------------------------------------------------------------------------------------------------------------------------------------------|
| 1. depressive disorder/ or depressive disorder, major/                                                                                                                                                                                                                                                                       |
| 2. (depressive disorder* or clinical depression* or unipolar depression* or major depression* or depressive disease* or depressive episode* or depressive illness* or depressive state* or depressive syndrome* or endogenous depression* or major depressive episode* or mental depression* or neurotic depression*).tw,kw. |
| 3. 1 or 2                                                                                                                                                                                                                                                                                                                    |
| 4. adolescent/                                                                                                                                                                                                                                                                                                               |
| 5. (adolescen* or teen* or girl or girls or boy or boys or youth* or peadiatric* or paediatric* or pediatric* or preadolescen* or preteen* or secondary school* or high school* or primary school* or elementary school*).tw,kw.                                                                                             |
| 6. 4 or 5                                                                                                                                                                                                                                                                                                                    |
| 7. 3 and 6                                                                                                                                                                                                                                                                                                                   |
| 8. limit 7 to yr="2008 - 2017"                                                                                                                                                                                                                                                                                               |
| 9. remove duplicates from 8                                                                                                                                                                                                                                                                                                  |

Date of search: 9 May 2018

## REFERENCES

1. Health Information Research Unit. Hedges. Health Information Research Unit: Evidence-Based Health Informatics. 2016. [https://hiru.mcmaster.ca/hiru/HIRU\\_Hedges\\_home.aspx](https://hiru.mcmaster.ca/hiru/HIRU_Hedges_home.aspx) (accessed 11 May 2018).
