# Supplementary material for: Outcomes reported in randomised clinical trials of major depressive disorder treatments in adolescents: a systematic scoping review protocol
Source: PubMed Central journal article supplement — BMJ Open. 2019 Jan 15;9(1):e024191. doi: 10.1136/bmjopen-2018-024191 (PMC6340428; doi:10.1136/bmjopen-2018-024191), 2019-01-15
Supplement: bmjopen-2018-024191supp001.pdf [file bmjopen-2018-024191supp001.pdf]

## APPENDIX A

eTable 1. PRISMA-P checklist.<sup>1</sup>

| Section and topic                 | Item No | Checklist item                                                                                                                                                                                                                | Location in manuscript                                                                                                                                                                                                                   |
|-----------------------------------|---------|-------------------------------------------------------------------------------------------------------------------------------------------------------------------------------------------------------------------------------|------------------------------------------------------------------------------------------------------------------------------------------------------------------------------------------------------------------------------------------|
| <b>ADMINISTRATIVE INFORMATION</b> |         |                                                                                                                                                                                                                               |                                                                                                                                                                                                                                          |
| Title:                            |         |                                                                                                                                                                                                                               |                                                                                                                                                                                                                                          |
| Identification                    | 1a      | Identify the report as a protocol of a systematic review                                                                                                                                                                      | Title                                                                                                                                                                                                                                    |
| Update                            | 1b      | If the protocol is for an update of a previous systematic review, identify as such                                                                                                                                            | Not applicable, and therefore, not stated                                                                                                                                                                                                |
| Registration                      | 2       | If registered, provide the name of the registry (such as PROSPERO) and registration number                                                                                                                                    | URL provided for Open Science Framework registration in abstract and in the section entitled "Protocol" under the heading "METHODS AND ANALYSIS"                                                                                         |
| Authors:                          |         |                                                                                                                                                                                                                               |                                                                                                                                                                                                                                          |
| Contact                           | 3a      | Provide name, institutional affiliation, e-mail address of all protocol authors; provide physical mailing address of corresponding author                                                                                     | Cover page                                                                                                                                                                                                                               |
| Contributions                     | 3b      | Describe contributions of protocol authors and identify the guarantor of the review                                                                                                                                           | Under heading "AUTHORS CONTRIBUTIONS"                                                                                                                                                                                                    |
| Amendments                        | 4       | If the protocol represents an amendment of a previously completed or published protocol, identify as such and list changes; otherwise, state plan for documenting important protocol amendments                               | Under the section entitled "Protocol" under the heading "METHODS AND ANALYSIS"                                                                                                                                                           |
| Support:                          |         |                                                                                                                                                                                                                               |                                                                                                                                                                                                                                          |
| Sources                           | 5a      | Indicate sources of financial or other support for the review                                                                                                                                                                 | Under heading "FUNDING STATEMENT"                                                                                                                                                                                                        |
| Sponsor                           | 5b      | Provide name for the review funder and/or sponsor                                                                                                                                                                             | Under heading "FUNDING STATEMENT"                                                                                                                                                                                                        |
| Role of sponsor or funder         | 5c      | Describe roles of funder(s), sponsor(s), and/or institution(s), if any, in developing the protocol                                                                                                                            | None; not applicable                                                                                                                                                                                                                     |
| <b>INTRODUCTION</b>               |         |                                                                                                                                                                                                                               |                                                                                                                                                                                                                                          |
| Rationale                         | 6       | Describe the rationale for the review in the context of what is already known                                                                                                                                                 | Under "INTRODUCTION"                                                                                                                                                                                                                     |
| Objectives                        | 7       | Provide an explicit statement of the question(s) the review will address with reference to participants, interventions, comparators, and outcomes (PICO)                                                                      | Objectives provided in "INTRODUCTION"                                                                                                                                                                                                    |
| <b>METHODS</b>                    |         |                                                                                                                                                                                                                               |                                                                                                                                                                                                                                          |
| Eligibility criteria              | 8       | Specify the study characteristics (such as PICO, study design, setting, time frame) and report characteristics (such as years considered, language, publication status) to be used as criteria for eligibility for the review | PICOT provided under section "Eligibility criteria" under the heading "METHODS AND ANALYSIS"                                                                                                                                             |
| Information sources               | 9       | Describe all intended information sources (such as electronic databases, contact with study authors, trial registers or other grey literature sources) with planned dates of coverage                                         | Date restrictions provided under section "Eligibility criteria" under the heading "METHODS AND ANALYSIS". Information sources described under section "Information sources and search strategy" under the heading "METHODS AND ANALYSIS" |
| Search strategy                   | 10      | Present draft of search strategy to be used                                                                                                                                                                                   | Final search strategies provided in Appendix                                                                                                                                                                                             |

|                                    |     |                                                                                                                                                                                                                                                  |                                                                                                                                                                                             |
|------------------------------------|-----|--------------------------------------------------------------------------------------------------------------------------------------------------------------------------------------------------------------------------------------------------|---------------------------------------------------------------------------------------------------------------------------------------------------------------------------------------------|
|                                    |     | for at least one electronic database, including planned limits, such that it could be repeated                                                                                                                                                   | B                                                                                                                                                                                           |
| Study records:                     |     |                                                                                                                                                                                                                                                  |                                                                                                                                                                                             |
| Data management                    | 11a | Describe the mechanism(s) that will be used to manage records and data throughout the review                                                                                                                                                     | Provided under the sub-section "Full-text screening" under the section "Source selection" and provided under the section and "Data charting", both under the heading "METHODS AND ANALYSIS" |
| Selection process                  | 11b | State the process that will be used for selecting studies (such as two independent reviewers) through each phase of the review (that is, screening, eligibility and inclusion in meta-analysis)                                                  | Provided under the sections "Source selection" and "Data charting" under the heading "METHODS AND ANALYSIS"                                                                                 |
| Data collection process            | 11c | Describe planned method of extracting data from reports (such as piloting forms, done independently, in duplicate), any processes for obtaining and confirming data from investigators                                                           | Provided under the sections "Data charting" and "Pilot testing" under the heading "METHODS AND ANALYSIS"                                                                                    |
| Data items                         | 12  | List and define all variables for which data will be sought (such as PICO items, funding sources), any pre-planned data assumptions and simplifications                                                                                          | Provided under the section "Data charting" under the heading "METHODS AND ANALYSIS"                                                                                                         |
| Outcomes and prioritization        | 13  | List and define all outcomes for which data will be sought, including prioritization of main and additional outcomes, with rationale                                                                                                             | Provided under the section "Data charting" under the heading "METHODS AND ANALYSIS"                                                                                                         |
| Risk of bias in individual studies | 14  | Describe anticipated methods for assessing risk of bias of individual studies, including whether this will be done at the outcome or study level, or both; state how this information will be used in data synthesis                             | Not applicable; this is a scoping review. However, explanation provided under section "Risk of bias assessment or quality appraisal" under the heading "METHODS AND ANALYSIS"               |
| Data synthesis                     | 15a | Describe criteria under which study data will be quantitatively synthesized                                                                                                                                                                      | Provided under section "Synthesis of results" under heading "METHODS AND ANALYSIS"                                                                                                          |
|                                    | 15b | If data are appropriate for quantitative synthesis, describe planned summary measures, methods of handling data and methods of combining data from studies, including any planned exploration of consistency (such as $I^2$ , Kendall's $\tau$ ) | Not applicable                                                                                                                                                                              |
|                                    | 15c | Describe any proposed additional analyses (such as sensitivity or subgroup analyses, meta-regression)                                                                                                                                            | Not applicable                                                                                                                                                                              |
|                                    | 15d | If quantitative synthesis is not appropriate, describe the type of summary planned                                                                                                                                                               | Provided under section "Synthesis of results" under heading "METHODS AND ANALYSIS"                                                                                                          |
| Meta-bias(es)                      | 16  | Specify any planned assessment of meta-bias(es) (such as publication bias across studies, selective reporting within studies)                                                                                                                    | Not applicable                                                                                                                                                                              |
| Confidence in cumulative evidence  | 17  | Describe how the strength of the body of evidence will be assessed (such as GRADE)                                                                                                                                                               | Not applicable                                                                                                                                                                              |

1. Moher D, Shamseer L, Clarke M, et al. Preferred reporting items for systematic review and meta-analysis protocols (PRISMA-P) 2015 statement. *Syst Rev* 2015;4:1.
