# Supplementary material for: Outcomes reported in randomised clinical trials of major depressive disorder treatments in adolescents: a systematic scoping review protocol
Source: PubMed Central journal article supplement — BMJ Open. 2019 Jan 15;9(1):e024191. doi: 10.1136/bmjopen-2018-024191 (PMC6340428; doi:10.1136/bmjopen-2018-024191), 2019-01-15
Supplement: bmjopen-2018-024191supp002.pdf [file bmjopen-2018-024191supp002.pdf]

**APPENDIX B****eTable 2. Search strategy designed for the Ovid Medical Literature Analysis and Retrieval System Online (MEDLINE)® Epub Ahead of Print, In-Process & Other Non-Indexed Citations, Ovid MEDLINE® Daily and Ovid MEDLINE® 1946 to Present database.**

| Search term                                                                                                                                                                                                                                                                                                                  |
|------------------------------------------------------------------------------------------------------------------------------------------------------------------------------------------------------------------------------------------------------------------------------------------------------------------------------|
| 1. depressive disorder/ or depressive disorder, major/                                                                                                                                                                                                                                                                       |
| 2. (depressive disorder* or clinical depression* or unipolar depression* or major depression* or depressive disease* or depressive episode* or depressive illness* or depressive state* or depressive syndrome* or endogenous depression* or major depressive episode* or mental depression* or neurotic depression*).tw,kf. |
| 3. 1 or 2                                                                                                                                                                                                                                                                                                                    |
| 4. adolescent/                                                                                                                                                                                                                                                                                                               |
| 5. (adolescen* or teen* or girl or girls or boy or boys or youth* or peadiatric* or paediatric* or pediatric* or preadolescen* or preteen* or secondary school* or high school* or primary school* or elementary school*).tw,kf.                                                                                             |
| 6. 4 or 5                                                                                                                                                                                                                                                                                                                    |
| 7. 3 and 6                                                                                                                                                                                                                                                                                                                   |
| 8. randomized controlled trial.pt. or randomized.mp. or placebo.mp.                                                                                                                                                                                                                                                          |
| 9. 7 and 8                                                                                                                                                                                                                                                                                                                   |
| 10. limit 9 to yr="2008 - 2017"                                                                                                                                                                                                                                                                                              |
| 11. remove duplicates from 10                                                                                                                                                                                                                                                                                                |

Date of search: 9 May 2018. Line 8 taken verbatim from the Health Information Research Unit (HiRU) RCT search filter<sup>1</sup> (Sensitivity=96%; Specificity=95%; Precision=39%; Accuracy=95%).

**eTable 3. Search strategy designed for the Ovid PsycINFO® 1967 to April Week 5 2018 database.**

| Search term                                                                                                                                                                                                                                                                                                                  |
|------------------------------------------------------------------------------------------------------------------------------------------------------------------------------------------------------------------------------------------------------------------------------------------------------------------------------|
| 1. major depression/                                                                                                                                                                                                                                                                                                         |
| 2. (depressive disorder* or clinical depression* or unipolar depression* or major depression* or depressive disease* or depressive episode* or depressive illness* or depressive state* or depressive syndrome* or endogenous depression* or major depressive episode* or mental depression* or neurotic depression*).tw,id. |
| 3. 1 or 2                                                                                                                                                                                                                                                                                                                    |
| 4. (adolescen* or teen* or girl or girls or boy or boys or youth* or peadiatric* or paediatric* or pediatric* or preadolescen* or preteen* or secondary school* or high school* or primary school* or elementary school*).mp.                                                                                                |
| 5. 3 and 4                                                                                                                                                                                                                                                                                                                   |
| 6. double-blind.tw. or random* assigned.tw. or control.tw.                                                                                                                                                                                                                                                                   |
| 7. 5 and 6                                                                                                                                                                                                                                                                                                                   |
| 8. limit 7 to yr="2008 - 2017"                                                                                                                                                                                                                                                                                               |
| 9. remove duplicates from 8                                                                                                                                                                                                                                                                                                  |

Date of search: 9 May 2018. Line 6 taken verbatim from the Health Information Research Unit (HiRU) RCT search filter<sup>1</sup> (Sensitivity=79%; Specificity=80%; Precision=13%; Accuracy – 80%).

**eTable 4. Search strategy designed for Ovid EBM Reviews - Cochrane Central Register of Controlled Trials March 2018 database.**

| Search term                                                                                                                                                                                                                                                                                                                  |
|------------------------------------------------------------------------------------------------------------------------------------------------------------------------------------------------------------------------------------------------------------------------------------------------------------------------------|
| 1. depressive disorder/ or depressive disorder, major/                                                                                                                                                                                                                                                                       |
| 2. (depressive disorder* or clinical depression* or unipolar depression* or major depression* or depressive disease* or depressive episode* or depressive illness* or depressive state* or depressive syndrome* or endogenous depression* or major depressive episode* or mental depression* or neurotic depression*).tw,kw. |
| 3. 1 or 2                                                                                                                                                                                                                                                                                                                    |
| 4. adolescent/                                                                                                                                                                                                                                                                                                               |
| 5. (adolescen* or teen* or girl or girls or boy or boys or youth* or peadiatric* or paediatric* or pediatric* or preadolescen* or preteen* or secondary school* or high school* or primary school* or elementary school*).tw,kw.                                                                                             |
| 6. 4 or 5                                                                                                                                                                                                                                                                                                                    |
| 7. 3 and 6                                                                                                                                                                                                                                                                                                                   |
| 8. limit 7 to yr="2008 - 2017"                                                                                                                                                                                                                                                                                               |
| 9. remove duplicates from 8                                                                                                                                                                                                                                                                                                  |

Date of search: 9 May 2018

**REFERENCES**

1. Health Information Research Unit. Hedges. Health Information Research Unit: Evidence-Based Health Informatics. 2016. [https://hiru.mcmaster.ca/hiru/HIRU\\_Hedges\\_home.aspx](https://hiru.mcmaster.ca/hiru/HIRU_Hedges_home.aspx) (accessed 11 May 2018).
